# Supplementary material
Source: PubMed Central journal article supplement (PMC3780312)
Supplement: Supp_Figure1.pdf [file Supp_Figure1.pdf]

## Supplementary Data

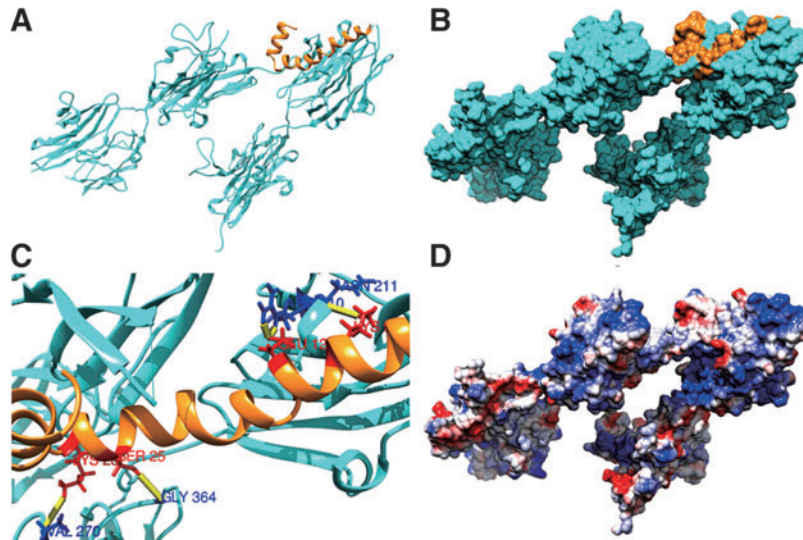

**SUPPLEMENTARY FIG. S1.** Molecular modeling of the interaction residues in the ARS-Interacting multi-functional protein 1 (AIMP1) peptide-fibroblast growth factor receptor 2 (FGFR2) complex. The AIMP1 peptide binding site in FGFR2 is shown with the ribbon presentation method (**A**) and surface model method (**B**): *orange*, AIMP1 peptide; *cyan*, FGFR2. (**C**) There are five hydrogen bonds between AIMP1 peptide and FGFR2 at four residues (9Lys-H<sup>δ</sup>-211Arg.IV, 12Glu-O<sup>δ</sup>-210Arg.IV, 25Ser-H<sup>γ</sup>-364Arg.cIII, and 28Lys-H<sup>ε</sup>-270Val.III). FGFR2 was a tetramer, and its subunits are designated as I-IV. The residues of AIMP1 peptide and FGFR2 are shown as *red* and *blue*, respectively. All hydrogen bonds between AIMP1 peptide and FGFR2 are displayed as *yellow lines*. (**D**) The electrostatic surface potential of the AIMP1 peptide-FGFR2 complex is colored *blue* (positively charged region) and *red* (negatively charged region) with an energy scale of  $-5 \sim 5$  in units of kcal/(mole $\cdot$ e). The energy-based score of the complex was  $-160.93$  from the FireDock results. The unit of the score is arbitrary, but the score is similar to the value expressed as kcal/mol that appears in other published data [1].

### Reference

1. Benyamini H and A Friedler. (2011). The ASPP interaction network: electrostatic differentiation between pro- and anti-apoptotic proteins. *J Mol Recognit* 24:266–274.
